# Supplementary material for: A hybrid nanosensor based on novel fluorescent iron oxide nanoparticles for highly selective determination of Hg2+ions in environmental samples
Source: Royal Society of Chemistry journal article supplement (doi:10.1039/d1nj02908h), 2021-01-01
Supplement: d1nj02908h1.pdf [file d1nj02908h1.pdf]

*Electronic supplementary information*

**A hybrid nanosensor based on novel fluorescent iron oxide nanoparticles  
for highly selective determination of Hg<sup>2+</sup> ion in environmental samples**

Süreyya Oğuz Tümay\*, Vildan Şanko, Ahmet Şenocak, Erhan Demirbas

Department of Chemistry, Gebze Technical University, Gebze 41400, Kocaeli, Turkey

\* Corresponding authors:

Dr. Süreyya Oğuz TÜMAY, Department of Chemistry, Gebze Technical University, P.O. Box:  
141, Gebze 41400, Kocaeli, Turkey

Tel: 00 90 262 6053106

Fax: 00 90 262 6053105

e-mail: [sotumay@gtu.edu.tr](mailto:sotumay@gtu.edu.tr)

**The caption of content:**

**Figure S1:** a)  $^1\text{H}$  NMR, b)  $^{13}\text{C}$  NMR and c) FTIR spectra of compound **1**. (NMR spectra were recorded in  $\text{CDCl}_3$ ).

**Figure S2:** a) MALDI-TOF b)  $^1\text{H}$  NMR, c)  $^{13}\text{C}$  NMR and d) FTIR spectra of compound **2**. (MALDI-MS spectrum was obtained with dithranol matrix and NMR spectra were recorded in  $\text{DMSO-d}_6$ ).

**Figure S3:** FTIR spectra of compound **2**,  $\text{AP@SiO}_2\text{@Fe}_2\text{O}_3$ ,  $\text{Py@Fe}_2\text{O}_3$  hybrid nanosensor.

**Figure S4:** UV-Vis spectra of compound **2**,  $\text{SiO}_2\text{@Fe}_2\text{O}_3$ ,  $\text{AP@SiO}_2\text{@Fe}_2\text{O}_3$ ,  $\text{Py@Fe}_2\text{O}_3$  hybrid nanosensor.

**Figure S5:** TGA thermograms of compound **2**,  $\text{Fe}_2\text{O}_3$ ,  $\text{SiO}_2\text{@Fe}_2\text{O}_3$ ,  $\text{AP@SiO}_2\text{@Fe}_2\text{O}_3$ ,  $\text{Py@Fe}_2\text{O}_3$  hybrid nanosensor.

**Figure S6.** XRD patterns of  $\text{Fe}_2\text{O}_3$ ,  $\text{AP@SiO}_2\text{@Fe}_2\text{O}_3$ ,  $\text{Py@Fe}_2\text{O}_3$ .

**Figure S7.** UV-Vis absorption of  $\text{Py@Fe}_2\text{O}_3$  in a) hexane, b) 1,4-dioxane, c) THF, d) dichloromethane, e) ACN, f) ethanol, g) DMSO, h) DMF, i) water in different concentration and j) normalized absorption spectra of  $\text{Py@Fe}_2\text{O}_3$  in different solvents.

**Figure S8.** Fluorescence spectra of  $\text{Py@Fe}_2\text{O}_3$  in a) hexane, b) 1,4-dioxane, c) THF, d) dichloromethane, e) ACN, f) ethanol, g) DMSO, h) DMF, i) water in different concentration and j) normalized fluorescence spectra of  $\text{Py@Fe}_2\text{O}_3$  in different solvents.

**Figure S9.** Interfering studies for  $0.4\text{ mg.mL}^{-1}$   $\text{Py@Fe}_2\text{O}_3$  in presence of  $1.0\text{ }\mu\text{mol.L}^{-1}$   $\text{Hg}^{2+}$  after addition of  $10\text{ }\mu\text{mol.L}^{-1}$  various competitive species (pH of 8.0,  $\lambda_{\text{ex}}=325\text{ nm}$ , and slit width = 5 nm).

**Figure S10.** Effect of a) pH, b) buffer concentration, c)  $\text{Py@Fe}_2\text{O}_3$  concentration, d) photostability and e) measurement time at pH of 8.0,  $\lambda_{\text{ex}}=325\text{ nm}$ ,  $0.4\text{ mg.mL}^{-1}$  of  $\text{Py@Fe}_2\text{O}_3$  and  $1.0\text{ }\mu\text{mol.L}^{-1}$   $\text{Hg}^{2+}$ , and slit width = 5 nm).

**Table S1:** Photophysical parameters of  $\text{Py@Fe}_2\text{O}_3$ .

**Table S2.** Optimum conditions of  $\text{Py@Fe}_2\text{O}_3$  for spectrofluorimetric determination of iron.

**Table S3.** Student t-test for statistical evaluation of accuracy.

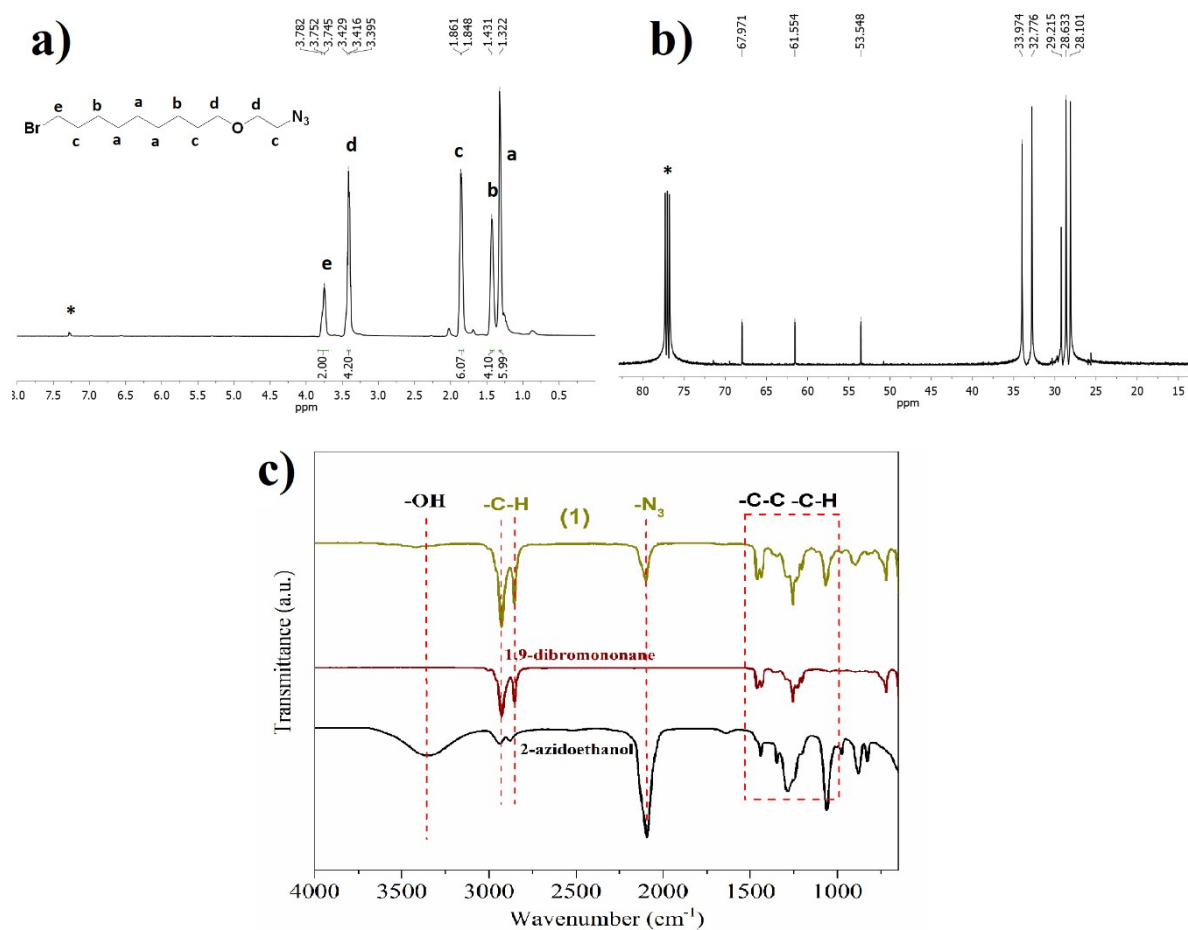

**Figure S1: a)**  $^1\text{H}$  NMR, **b)**  $^{13}\text{C}$  NMR and **c)** FTIR spectra of compound **1**. (NMR spectra were recorded in  $\text{CDCl}_3$ ).

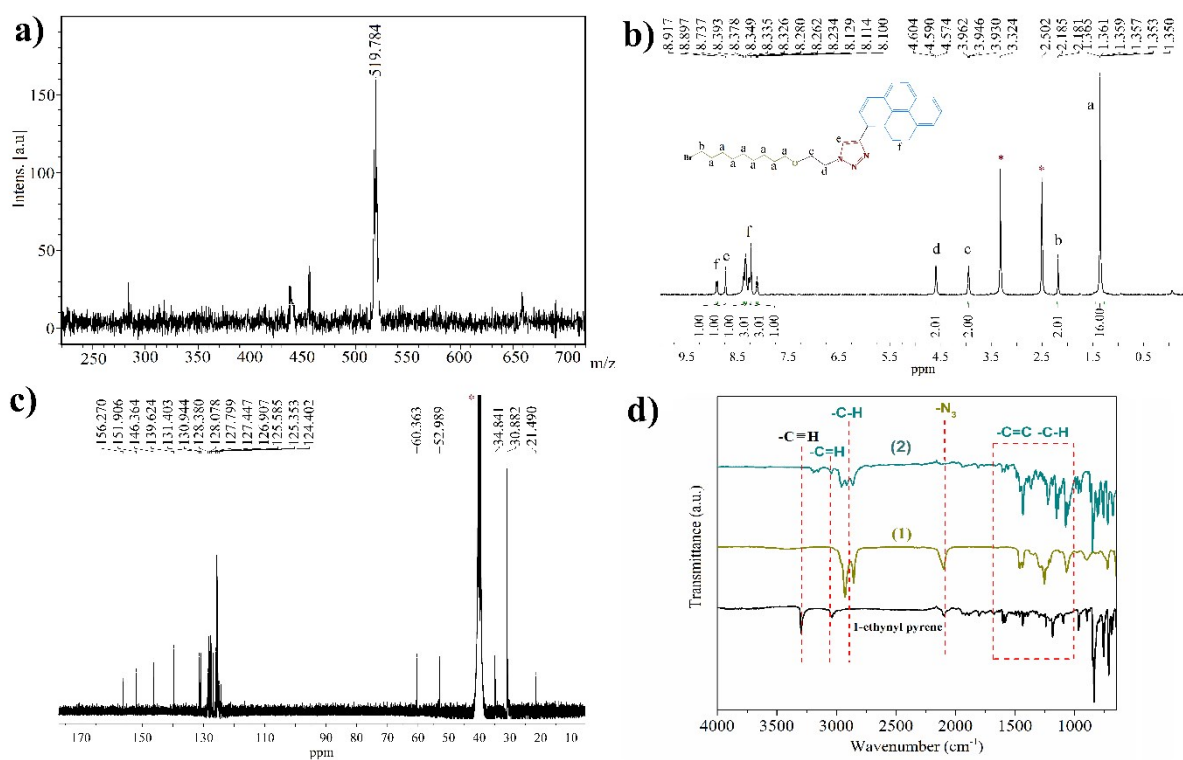

**Figure S2: a)** MALDI-TOF **b)**  $^1\text{H}$  NMR, **c)**  $^{13}\text{C}$  NMR and **d)** FTIR spectra of compound 2. (MALDI-MS spectrum was obtained with dithranol matrix and NMR spectra were recorded in  $\text{DMSO-d}_6$ ).

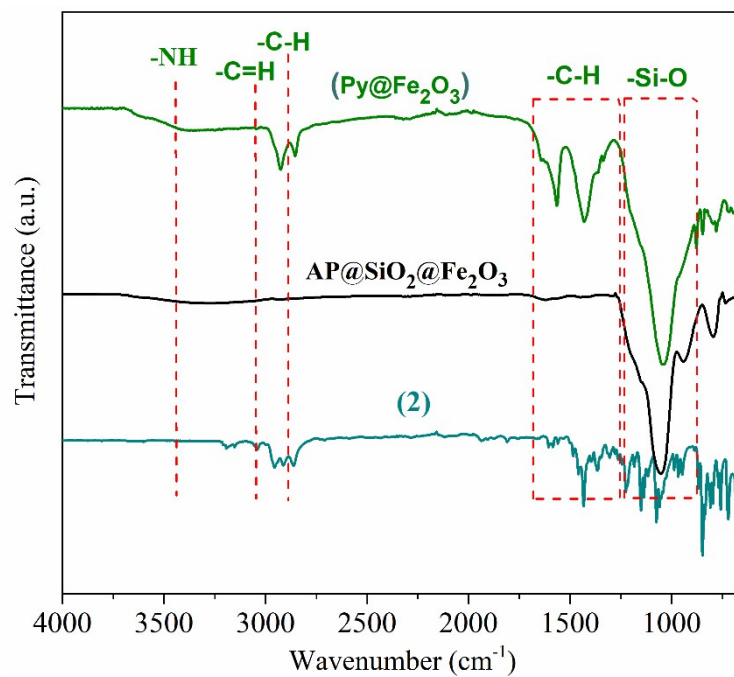

**Figure S3:** FTIR spectra of compound **2**,  $\text{AP}@SiO_2@Fe_2O_3$ ,  $\text{Py}@Fe_2O_3$  hybrid nanosensor.

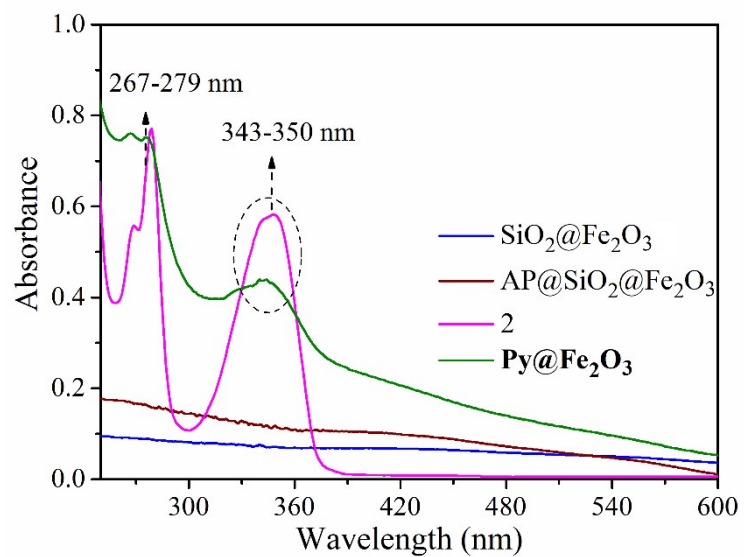

**Figure S4:** UV-Vis spectra of compound **2**, SiO<sub>2</sub>@Fe<sub>2</sub>O<sub>3</sub>, AP@SiO<sub>2</sub>@Fe<sub>2</sub>O<sub>3</sub>, **Py@Fe<sub>2</sub>O<sub>3</sub>** hybrid nanosensor.

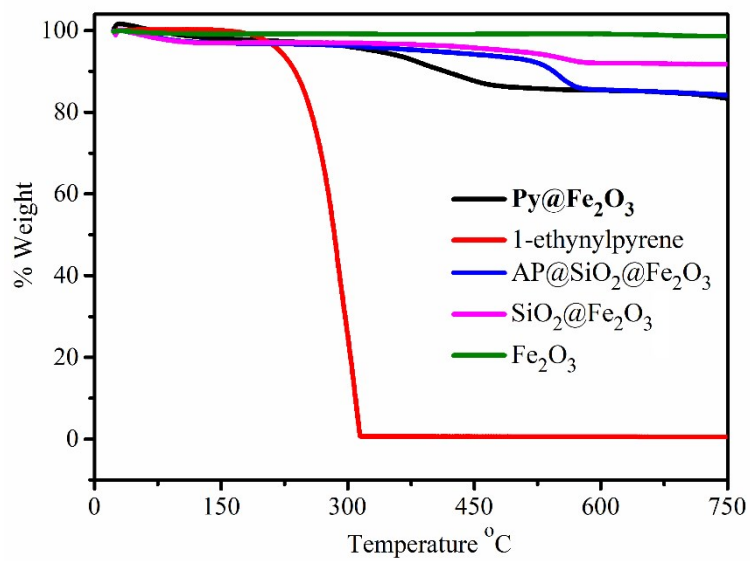

**Figure S5:** TGA thermograms of compound **2**, Fe<sub>2</sub>O<sub>3</sub>, SiO<sub>2</sub>@Fe<sub>2</sub>O<sub>3</sub>, AP@SiO<sub>2</sub>@Fe<sub>2</sub>O<sub>3</sub>, Py@Fe<sub>2</sub>O<sub>3</sub> hybrid nanosensor.

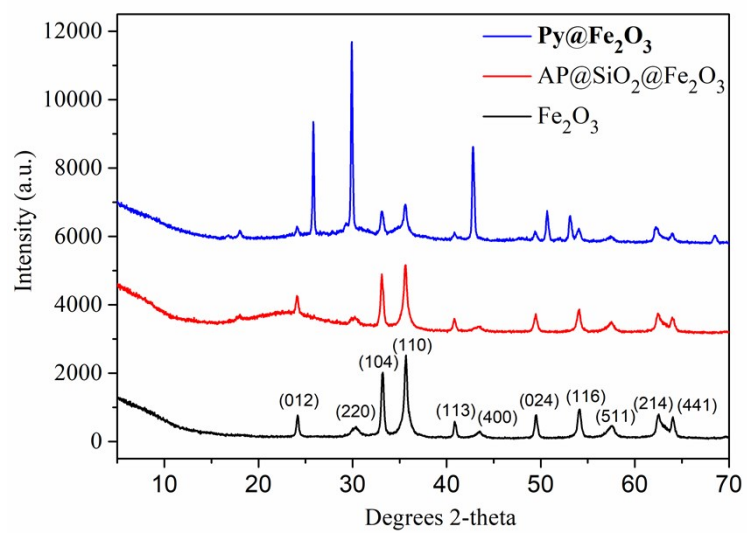

**Figure S6.** XRD patterns of  $\text{Fe}_2\text{O}_3$ ,  $\text{AP@SiO}_2\text{@Fe}_2\text{O}_3$ ,  $\text{Py@Fe}_2\text{O}_3$ .



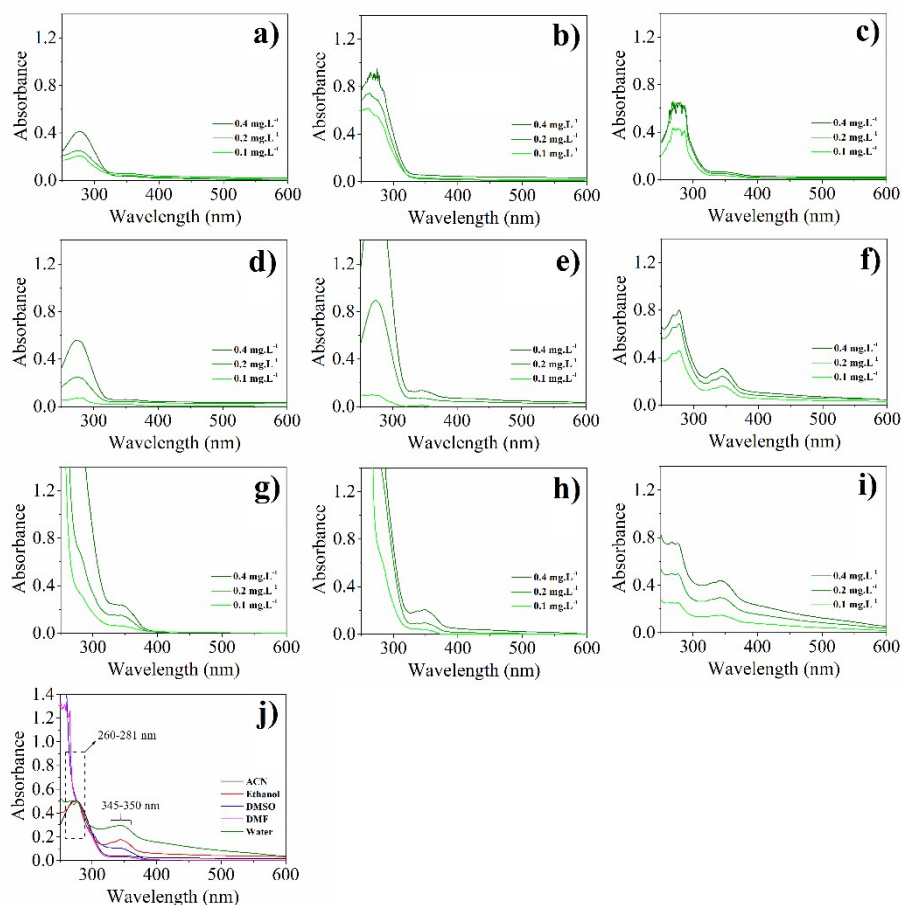

**Figure S7.** UV-Vis absorption of  $\text{Py@Fe}_2\text{O}_3$  in **a)** hexane, **b)** 1,4-dioxane, **c)** THF, **d)** dichloromethane, **e)** ACN, **f)** ethanol, **g)** DMSO, **h)** DMF, **i)** water in different concentration and **j)** normalized absorption spectra of  $\text{Py@Fe}_2\text{O}_3$  in different solvents.

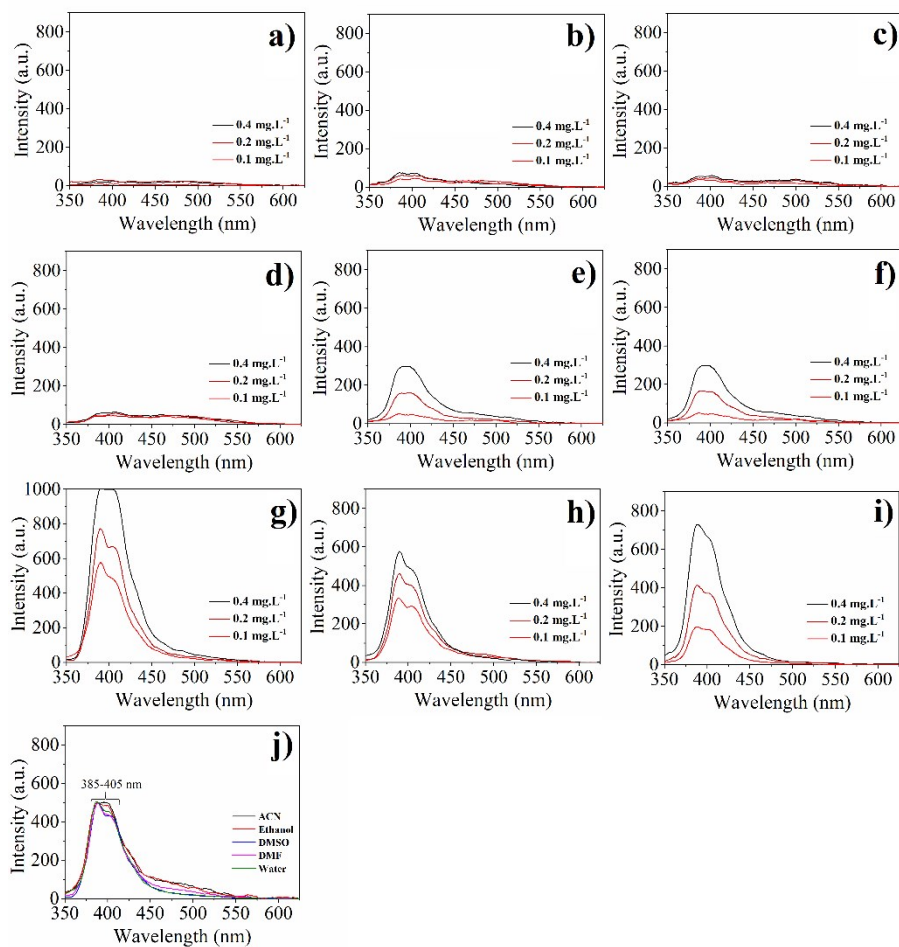

**Figure S8.** Fluorescence spectra of Py@Fe<sub>2</sub>O<sub>3</sub> in **a)** hexane, **b)** 1,4-dioxane, **c)** THF, **d)** dichloromethane, **e)** ACN, **f)** ethanol, **g)** DMSO, **h)** DMF, **i)** water in different concentration and **j)** normalized fluorescence spectra of Py@Fe<sub>2</sub>O<sub>3</sub> in different solvents.

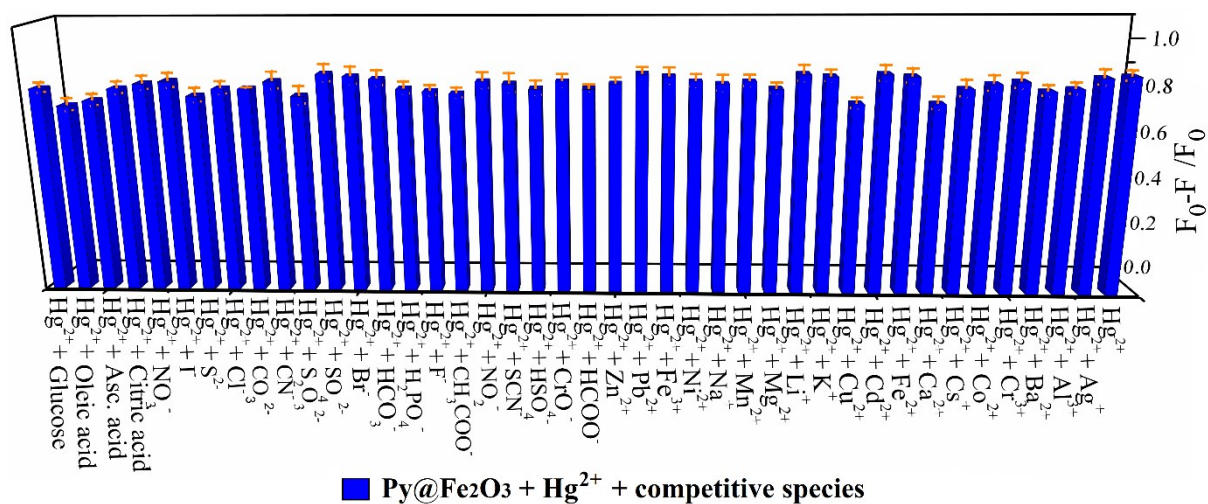

**Figure S9.** Interfering studies for 0.4 mg.mL<sup>-1</sup> Py@Fe<sub>2</sub>O<sub>3</sub> in presence of 1.0 μmol.L<sup>-1</sup> Hg<sup>2+</sup> after addition of 10 μmol.L<sup>-1</sup> various competitive species (pH of 8.0, λ<sub>ex</sub>=325 nm, and slit width = 5 nm).

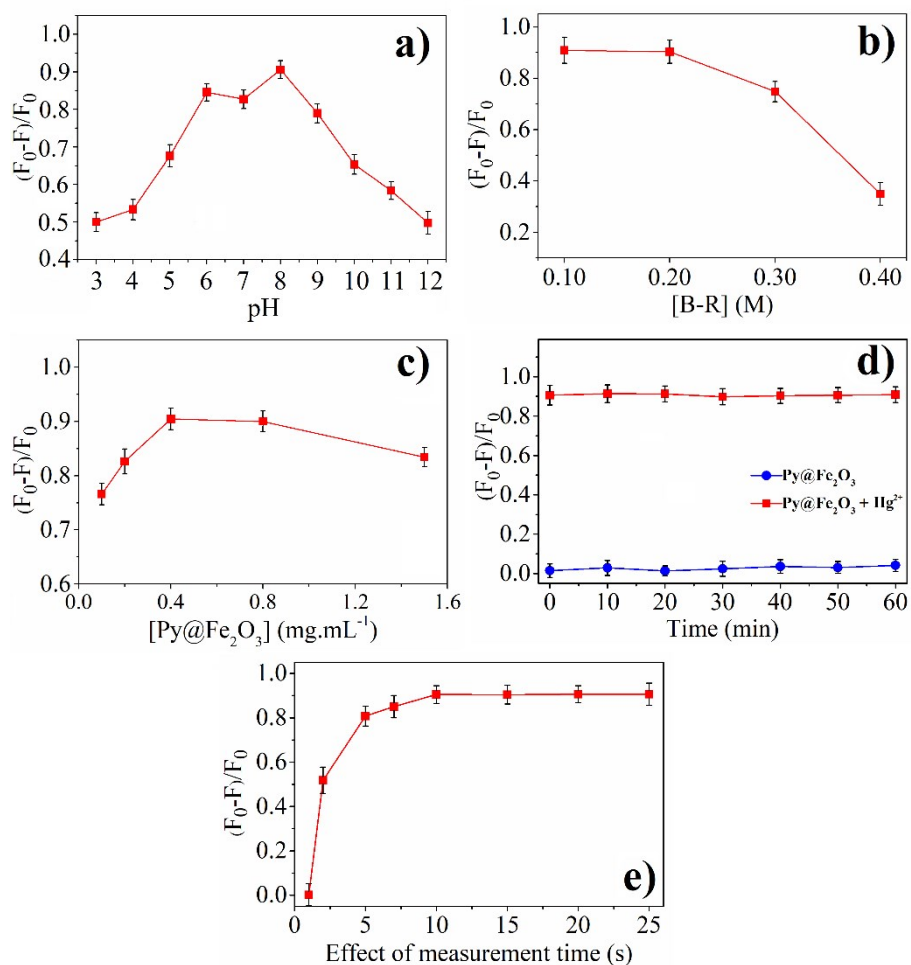

**Figure S10.** Effect of **a)** pH, **b)** buffer concentration, **c)**  $\text{Py}@Fe_2O_3$  concentration, **d)** photostability and **e)** measurement time at pH of 8.0,  $\lambda_{\text{ex}}=325$  nm,  $0.4 \text{ mg}\cdot\text{mL}^{-1}$  of  $\text{Py}@Fe_2O_3$  and  $1.0 \mu\text{mol}\cdot\text{L}^{-1} Hg^{2+}$ , and slit width = 5 nm).

**Table S1:** Photophysical parameters of **Py@Fe<sub>2</sub>O<sub>3</sub>**.

| $\epsilon$ (mL.g <sup>-1</sup> .cm <sup>-1</sup> ) x10 <sup>3</sup> |       |       |       |       |       |       |       |       | $\lambda_{\text{abs}}$ | $\lambda_{\text{ems}}$ | $\tau_0$ (ns) | $\Phi_F$ |
|---------------------------------------------------------------------|-------|-------|-------|-------|-------|-------|-------|-------|------------------------|------------------------|---------------|----------|
| *Water                                                              | DMF   | DMSO  | DCM   | EtOH  | ACN   | THF   | Dxn   | Hxn   | (nm)                   | (nm)                   |               |          |
| 1.465                                                               | 0.465 | 0.745 | 0.206 | 1.205 | 0.345 | 0.250 | 0.119 | 0.288 | 272                    | 388                    | 0.343±0.08    | 0.230    |
|                                                                     |       |       |       |       |       |       |       |       | 345                    |                        |               |          |

\*Hxn, n-hexane; Dxn, 1,4-dioxane; THF, tetrahydrofuran; DCM, dichloromethane; ACN, acetonitrile; EtOH, ethanol; DMSO; dimethyl sulfoxide, DMF; dimethylformamide.

**Table S2.** Optimum conditions of **Py@Fe<sub>2</sub>O<sub>3</sub>** for spectrofluorimetric determination of iron.

| <b>Parameter</b>                            | <b>Value</b> |
|---------------------------------------------|--------------|
| Exc. (nm)                                   | 325          |
| Ems. (nm)                                   | 388          |
| LOD (nmol.L <sup>-1</sup> )                 | 3.650        |
| LOQ (nmol.L <sup>-1</sup> )                 | 10.960       |
| Linear range (μmol.L <sup>-1</sup> )        | 0.010-1.000  |
| pH                                          | 8.0          |
| Sensor concentration (mg.mL <sup>-1</sup> ) | 0.4          |
| Final volume (mL)                           | 5            |
| Working media                               | water        |
| Interaction time (second)                   | 10           |
| R <sup>2</sup>                              | 0.9976       |
| RSD%                                        | 3.52         |

**Table S3.** Student t-test for statistical evaluation of accuracy.

| <b>Hg<sup>2+</sup></b> | <b>s</b> | <b>X<sub>R</sub></b> | $\bar{X}$ | $t_{\text{exp.}} = \frac{ X_R - \bar{X} }{s/\sqrt{N}}$ | <b>t<sub>ref.</sub></b> | <b>Results</b>        |
|------------------------|----------|----------------------|-----------|--------------------------------------------------------|-------------------------|-----------------------|
| <b>River water</b>     | 2.59     | 1.819                | 2.006     | 0.13                                                   | 4.3                     | 0.13<4.3 (acceptable) |
| <b>Mineral water</b>   | 2.33     | 1.581                | 1.504     | 0.06                                                   | 4.3                     | 0.06<4.3 (acceptable) |
| <b>Wastewater</b>      | 2.08     | 12.280               | 12.030    | 0.21                                                   | 4.3                     | 0.21<4.3 (acceptable) |
